# Supplementary material
Source: PubMed Central journal article supplement (PMC10662370)
Supplement: NIHMS1933856-supplement-Appendix.pdf [file NIHMS1933856-supplement-Appendix.pdf]

## **Online Appendix**

A Generational Shift:  
Race and the Declining Lifetime Risk of Imprisonment

Jason P. Robey  
University at Albany, State University of New York  
School of Criminal Justice

Michael Massoglia  
University of Wisconsin-Madison  
Department of Sociology

Michael T. Light  
University of Wisconsin-Madison  
Department of Sociology

## Online Appendix

**Table A1.** Age Distributions from Official NPS Reports and NCRP Estimates, by Race and Gender, 2012, United States

| Age   | All |      | Men |      | White Men |      | Hispanic Men |      | Black Men |      |
|-------|-----|------|-----|------|-----------|------|--------------|------|-----------|------|
|       | NPS | NCRP | NPS | NCRP | NPS       | NCRP | NPS          | NCRP | NPS       | NCRP |
| 18-19 | 4%  | 4%   | 4%  | 4%   | 2%        | 3%   | 4%           | 5%   | 5%        | 5%   |
| 20-24 | 18% | 19%  | 18% | 20%  | 15%       | 17%  | 19%          | 21%  | 20%       | 22%  |
| 25-29 | 19% | 19%  | 19% | 19%  | 18%       | 19%  | 21%          | 20%  | 18%       | 18%  |
| 30-34 | 17% | 17%  | 17% | 17%  | 16%       | 17%  | 18%          | 17%  | 16%       | 15%  |
| 35-39 | 12% | 12%  | 12% | 12%  | 13%       | 12%  | 13%          | 12%  | 11%       | 10%  |
| 40-44 | 11% | 10%  | 11% | 10%  | 12%       | 11%  | 10%          | 9%   | 10%       | 9%   |
| 45-49 | 9%  | 9%   | 9%  | 9%   | 10%       | 9%   | 7%           | 7%   | 9%        | 9%   |
| 50-44 | 6%  | 6%   | 6%  | 6%   | 7%        | 7%   | 4%           | 4%   | 6%        | 6%   |
| 55+   | 4%  | 4%   | 4%  | 5%   | 6%        | 5%   | 3%           | 3%   | 4%        | 4%   |

*Note:* NPS column is the age distribution of admitted prisoners in 2012 reported in the Prisoners Series from the National Prisoner Statistics. NCRP column is the authors' calculation based on the age distribution of 604,230 individual admissions recorded in 2012 in the National Corrections Reporting Program.

**Table A2.** Robustness Checks, Risk of Incarceration by Age 38, United States

|              |                       | A.                | B.                             | C.                             | D.                             | E.                             | F.                                |
|--------------|-----------------------|-------------------|--------------------------------|--------------------------------|--------------------------------|--------------------------------|-----------------------------------|
|              |                       | Baseline Estimate | 2004 Survey Used for 2005-2015 | 2004 Survey Used for 1999-2019 | 2016 Survey Used for 2005-2015 | 2016 Survey Used for 1999-2019 | NCRP Estimates Used for 2010-2019 |
| All          | Real Cohort 1999-2019 | 6.5%              | 6.3%                           | 6.3%                           | 6.9%                           | 7.5%                           | 6.5%                              |
|              | Synthetic Cohort 1999 | 5.8%              | -                              | 5.9%                           | -                              | 7.0%                           | -                                 |
|              | Synthetic Cohort 2019 | 4.7%              | -                              | 4.1%                           | -                              | -                              | 4.5%                              |
| Men          | Real Cohort 1999-2019 | 11.3%             | 11.0%                          | 11.0%                          | 12.0%                          | 13.2%                          | 11.3%                             |
|              | Synthetic Cohort 1999 | 10.1%             | -                              | 10.3%                          | -                              | 12.2%                          | -                                 |
|              | Synthetic Cohort 2019 | 7.9%              | -                              | 6.8%                           | -                              | -                              | 7.4%                              |
| White Men    | Real Cohort 1999-2019 | 5.9%              | 5.6%                           | 5.5%                           | 6.4%                           | 7.0%                           | 5.9%                              |
|              | Synthetic Cohort 1999 | 4.6%              | -                              | 4.7%                           | -                              | 5.9%                           | -                                 |
|              | Synthetic Cohort 2019 | 3.8%              | -                              | 3.1%                           | -                              | -                              | 3.7%                              |
| Hispanic Men | Real Cohort 1999-2019 | 12.8%             | 12.5%                          | 12.4%                          | 13.6%                          | 15.1%                          | 12.9%                             |
|              | Synthetic Cohort 1999 | 12.7%             | -                              | 12.5%                          | -                              | 15.1%                          | -                                 |
|              | Synthetic Cohort 2019 | 10.1%             | -                              | 8.6%                           | -                              | -                              | 9.6%                              |
| Black Men    | Real Cohort 1999-2019 | 33.7%             | 33.8%                          | 34.0%                          | 34.7%                          | 37.7%                          | 33.0%                             |
|              | Synthetic Cohort 1999 | 35.8%             | -                              | 36.9%                          | -                              | 39.9%                          | -                                 |
|              | Synthetic Cohort 2019 | 18.3%             | -                              | 17.2%                          | -                              | -                              | 16.6%                             |

*Note:* We have conducted five robustness checks to demonstrate that the lifetime risk estimates are unaffected by the choice to linearly interpolate between survey years or any differences between the 2004 SCIFCF and the 2016 SPI. These surveys are only used to estimate one parameter,  $f_x$ , the estimated proportion of admissions that were first-time admissions at age  $x$ . All other parameters in the models remain the same as in the baseline analysis. Cells with dashes represent estimates that are entirely unaffected by the robustness check scenario. Across these five robustness checks, our estimates are consistent and the statistical and substantive conclusions remain unchanged. In every alternative scenario, the estimated declines in black male incarceration risk would be *larger* than those estimated in the baseline analysis. First, rather than linearly interpolating the estimates, we assume the 2004 survey estimates held for all years from 2005-2015. As shown in column B of Appendix Table 2, the estimated real cohort risk of incarceration for the 1999 cohort is only slightly affected. The synthetic cohort estimates for the 1999 and 2019 cohorts remain unchanged. Second, we make a stronger assumption and assume that the 2004 survey estimates applied for the entire observation period from 1999-2019. These results are shown in Column C. This strong assumption only slightly affects our estimates for the risk for the real 1999 cohort, the synthetic 1999 cohort, and the synthetic 2019 cohort. Notably, under this scenario the estimated risk for black men is slightly higher in 1999 and slightly lower in 2019. Substantively, this means if we use the 2004 survey estimates for the entire period, we would have observed larger declines in black male incarceration risk. Third, we instead assume that the 2016 survey estimates are more reliable and held from 2005-2015. Under this alternative scenario, shown in column D, the estimates for the real cohort estimate for the 1999 cohort are again only slightly affected. The estimates for the synthetic 1999 and 2019 cohorts are unaffected by this alternative scenario. Fourth, in column E, we make a stronger assumption about the 2016 survey and assume it held for the entire period from 1999-2019. As in the previous scenarios, this alternative scenario results in slightly higher estimates of the lifetime risk of incarceration for the earlier cohorts. Thus, under this scenario, the declines in black male incarceration would have been even larger. Fifth and lastly, aside from multiple robustness checks on the interpolation strategy, we also use an entirely different dataset to estimate the percentage of admissions that are first-time admissions. The restricted-access version of the NCRP data includes a variable on whether the individual has previously been incarcerated for a felony offense. Although the NCRP covers our entire observation period, the BJS cautions that the prior incarceration variable should only be used from 2010 onward. As a final check, in Column F, we estimate the lifetime risk of incarceration using the NCRP to estimate the proportion of first-time prison admissions. Again, the estimated risk of incarceration remains relatively unchanged and the substantive conclusions are the same. Once again, the decline in incarceration for black men would be larger if we used the NCRP data.

**Table A3. State-Level Changes in Incarceration and Racial Disparities from Peak Year of Black Male Incarceration to 2019, United States**

| State | Peak Year | Black Male Inc. Rate in Peak Year | White Male Inc. Rate in Peak Year | B:W Disparity in Peak Year | Black Male Inc. Rate in 2019 | White Male Inc. Rate in 2019 | B:W Disparity in 2019 | % Change in Black Male Rate | % Change in White Male Rate | % Change in B:W Disparity |
|-------|-----------|-----------------------------------|-----------------------------------|----------------------------|------------------------------|------------------------------|-----------------------|-----------------------------|-----------------------------|---------------------------|
| AK    | 1997      | 6661                              | 1039                              | 6.4                        | 3342                         | 855                          | 3.9                   | -50%                        | -18%                        | -39%                      |
| AL    | 2002      | 4617                              | 803                               | 5.7                        | 3112                         | 908                          | 3.4                   | -33%                        | 13%                         | -40%                      |
| AR    | 2014      | 4688                              | 1021                              | 4.6                        | 4291                         | 1010                         | 4.2                   | -8%                         | -1%                         | -7%                       |
| AZ    | 1994      | 7024                              | 1301                              | 5.4                        | 4265                         | 868                          | 4.9                   | -39%                        | -33%                        | -9%                       |
| CA    | 1998      | 6150                              | 687                               | 8.9                        | 3572                         | 382                          | 9.3                   | -42%                        | -44%                        | 4%                        |
| CO    | 2003      | 5740                              | 636                               | 9.0                        | 3092                         | 497                          | 6.2                   | -46%                        | -22%                        | -31%                      |
| CT    | 1999      | 8376                              | 462                               | 18.1                       | 3730                         | 348                          | 10.7                  | -55%                        | -25%                        | -41%                      |
| DE    | 1999      | 8723                              | 1082                              | 8.1                        | 4263                         | 707                          | 6.0                   | -51%                        | -35%                        | -25%                      |
| FL    | 1995      | 5591                              | 634                               | 8.8                        | 3597                         | 715                          | 5.0                   | -36%                        | 13%                         | -43%                      |
| GA    | 2004      | 3874                              | 744                               | 5.2                        | 2679                         | 798                          | 3.4                   | -31%                        | 7%                          | -36%                      |
| HI    | 2004      | 2061                              | 907                               | 2.3                        | 1166                         | 686                          | 1.7                   | -43%                        | -24%                        | -25%                      |
| IA    | 1998      | 8520                              | 480                               | 17.7                       | 4553                         | 516                          | 8.8                   | -47%                        | 7%                          | -50%                      |
| ID    | 2012      | 4238                              | 1029                              | 4.1                        | 3649                         | 1071                         | 3.4                   | -14%                        | 4%                          | -17%                      |
| IL    | 1999      | 4788                              | 323                               | 14.8                       | 3164                         | 355                          | 8.9                   | -34%                        | 10%                         | -40%                      |
| IN    | 2008      | 5360                              | 725                               | 7.4                        | 3664                         | 720                          | 5.1                   | -32%                        | -1%                         | -31%                      |
| KS    | 1997      | 5745                              | 532                               | 10.8                       | 3724                         | 602                          | 6.2                   | -35%                        | 13%                         | -43%                      |
| KY    | 1997      | 5636                              | 645                               | 8.7                        | 3299                         | 1025                         | 3.2                   | -41%                        | 59%                         | -63%                      |
| LA    | 2005      | 5830                              | 999                               | 5.8                        | 3937                         | 892                          | 4.4                   | -32%                        | -11%                        | -24%                      |
| MA    | 1996      | 3260                              | 268                               | 12.2                       | 1159                         | 166                          | 7.0                   | -64%                        | -38%                        | -43%                      |
| MD    | 1996      | 3727                              | 374                               | 10.0                       | 1971                         | 328                          | 6.0                   | -47%                        | -12%                        | -40%                      |
| ME    | 2004      | 2644                              | 344                               | 7.7                        | 2471                         | 321                          | 7.7                   | -7%                         | -7%                         | 0%                        |
| MI    | 2002      | 5829                              | 696                               | 8.4                        | 3893                         | 536                          | 7.3                   | -33%                        | -23%                        | -13%                      |
| MN    | 1996      | 3976                              | 158                               | 25.2                       | 2549                         | 241                          | 10.6                  | -36%                        | 52%                         | -58%                      |
| MO    | 2002      | 5839                              | 886                               | 6.6                        | 3411                         | 756                          | 4.5                   | -42%                        | -15%                        | -31%                      |

|    |      |       |      |      |      |      |      |      |      |      |
|----|------|-------|------|------|------|------|------|------|------|------|
| MS | 2003 | 4604  | 947  | 4.9  | 3040 | 961  | 3.2  | -34% | 2%   | -35% |
| MT | 1996 | 4976  | 568  | 8.8  | 3431 | 810  | 4.2  | -31% | 43%  | -52% |
| NC | 1997 | 3655  | 446  | 8.2  | 2099 | 448  | 4.7  | -43% | 0%   | -43% |
| ND | 2007 | 2777  | 360  | 7.7  | 1625 | 376  | 4.3  | -41% | 5%   | -44% |
| NE | 1996 | 4754  | 371  | 12.8 | 4012 | 453  | 8.9  | -16% | 22%  | -31% |
| NH | 1995 | 4323  | 440  | 9.8  | 1202 | 472  | 2.5  | -72% | 7%   | -74% |
| NJ | 1998 | 5411  | 354  | 15.3 | 2604 | 191  | 13.6 | -52% | -46% | -11% |
| NM | 1999 | 4184  | 1202 | 3.5  | 2156 | 446  | 4.8  | -48% | -63% | 39%  |
| NV | 1990 | 5975  | 761  | 7.9  | 3289 | 745  | 4.4  | -45% | -2%  | -44% |
| NY | 1996 | 4122  | 637  | 6.5  | 1968 | 220  | 8.9  | -52% | -65% | 38%  |
| OH | 1997 | 6157  | 593  | 10.4 | 3890 | 616  | 6.3  | -37% | 4%   | -39% |
| OK | 1997 | 7813  | 1046 | 7.5  | 5323 | 1119 | 4.8  | -32% | 7%   | -36% |
| OR | 1991 | 5341  | 490  | 10.9 | 3202 | 759  | 4.2  | -40% | 55%  | -61% |
| PA | 2009 | 5383  | 468  | 11.5 | 3916 | 468  | 8.4  | -27% | 0%   | -27% |
| RI | 1996 | 7858  | 590  | 13.3 | 2804 | 337  | 8.3  | -64% | -43% | -37% |
| SC | 1998 | 4039  | 629  | 6.4  | 2233 | 465  | 4.8  | -45% | -26% | -25% |
| SD | 2005 | 5505  | 855  | 6.4  | 3036 | 620  | 4.9  | -45% | -27% | -24% |
| TN | 1999 | 4014  | 567  | 7.1  | 2597 | 634  | 4.1  | -35% | 12%  | -42% |
| TX | 1999 | 8508  | 2065 | 4.1  | 3809 | 963  | 4.0  | -55% | -53% | -4%  |
| UT | 2000 | 5909  | 551  | 10.7 | 2427 | 402  | 6.0  | -59% | -27% | -44% |
| VA | 2003 | 4325  | 568  | 7.6  | 3071 | 618  | 5.0  | -29% | 9%   | -35% |
| VT | 2006 | 9631  | 768  | 12.5 | 3287 | 540  | 6.1  | -66% | -30% | -51% |
| WA | 1998 | 4185  | 530  | 7.9  | 2145 | 476  | 4.5  | -49% | -10% | -43% |
| WI | 1999 | 10477 | 527  | 19.9 | 7253 | 516  | 14.1 | -31% | -2%  | -29% |
| WV | 2007 | 3035  | 673  | 4.5  | 2805 | 772  | 3.6  | -8%  | 15%  | -19% |
| WY | 2000 | 5500  | 694  | 7.9  | 3309 | 816  | 4.1  | -40% | 18%  | -49% |

*Note:* Authors' calculations based on race-gender-state-specific counts of individuals in state prisons and race-gender-state specific estimates of the adult population.

**Table A4.** Tests of Normality of Distributions for State Level Changes in Incarceration Rates from 1999 to 2019, by Race and Gender, United States

| <i>Panel A. Shapiro-Francia W Test for Normal Distribution</i> |       |       |        |        |
|----------------------------------------------------------------|-------|-------|--------|--------|
| Demographic                                                    | W     | V     | z      | Prob>z |
| All                                                            | 0.953 | 2.430 | 1.678  | 0.047  |
| White Men                                                      | 0.983 | 0.887 | -0.228 | 0.590  |
| Black Men                                                      | 0.939 | 3.190 | 2.193  | 0.014  |
| <i>Panel B. Shapiro-Wilk W Test for Normal Distribution</i>    |       |       |        |        |
| Demographic                                                    | W     | V     | z      | Prob>z |
| All                                                            | 0.956 | 2.062 | 1.543  | 0.061  |
| White Men                                                      | 0.980 | 0.927 | -0.161 | 0.564  |
| Black Men                                                      | 0.940 | 2.820 | 2.211  | 0.014  |

*Note:* Authors' calculations. The null hypothesis for the Shapiro-Wilk and Shapiro-Francia test is that the data fits a normal distribution. Rejecting the null hypothesis provides strong evidence that the data is not normally distributed.

**Table A5.** Multiple-Decrement Life Table, White Men and Black Men, United States, 1999  
Real Cohort

| Year | Age | White Men |         |         |         | Black Men |         |         |         |
|------|-----|-----------|---------|---------|---------|-----------|---------|---------|---------|
|      |     | $l_x$     | $d_x^I$ | $d_x^D$ | $r_x^I$ | $l_x$     | $d_x^I$ | $d_x^D$ | $r_x^I$ |
| 1999 | 18  | 100,000   | 197     | 111     | 0.2%    | 100,000   | 1,876   | 193     | 1.9%    |
| 2000 | 19  | 99,692    | 358     | 118     | 0.6%    | 97,931    | 2,859   | 201     | 4.7%    |
| 2001 | 20  | 99,217    | 364     | 119     | 0.9%    | 94,870    | 2,700   | 204     | 7.4%    |
| 2002 | 21  | 98,734    | 376     | 130     | 1.3%    | 91,967    | 2,854   | 214     | 10.3%   |
| 2003 | 22  | 98,228    | 399     | 133     | 1.7%    | 88,899    | 2,874   | 212     | 13.2%   |
| 2004 | 23  | 97,697    | 384     | 128     | 2.1%    | 85,814    | 2,637   | 191     | 15.8%   |
| 2005 | 24  | 97,185    | 418     | 130     | 2.5%    | 82,987    | 2,645   | 209     | 18.4%   |
| 2006 | 25  | 96,637    | 323     | 143     | 2.8%    | 80,132    | 1,915   | 203     | 20.4%   |
| 2007 | 26  | 96,172    | 321     | 133     | 3.1%    | 78,014    | 1,984   | 192     | 22.3%   |
| 2008 | 27  | 95,717    | 321     | 132     | 3.5%    | 75,838    | 1,886   | 187     | 24.2%   |
| 2009 | 28  | 95,264    | 319     | 128     | 3.8%    | 73,766    | 1,826   | 181     | 26.1%   |
| 2010 | 29  | 94,817    | 299     | 133     | 4.1%    | 71,758    | 1,611   | 164     | 27.7%   |
| 2011 | 30  | 94,385    | 250     | 138     | 4.3%    | 69,983    | 1,024   | 167     | 28.7%   |
| 2012 | 31  | 93,997    | 222     | 143     | 4.6%    | 68,793    | 878     | 160     | 29.6%   |
| 2013 | 32  | 93,632    | 231     | 145     | 4.8%    | 67,755    | 825     | 165     | 30.4%   |
| 2014 | 33  | 93,256    | 236     | 159     | 5.0%    | 66,764    | 779     | 166     | 31.2%   |
| 2015 | 34  | 92,861    | 220     | 182     | 5.2%    | 65,820    | 685     | 184     | 31.9%   |
| 2016 | 35  | 92,459    | 169     | 208     | 5.4%    | 64,950    | 500     | 204     | 32.4%   |
| 2017 | 36  | 92,082    | 165     | 220     | 5.6%    | 64,246    | 474     | 213     | 32.8%   |
| 2018 | 37  | 91,697    | 161     | 221     | 5.7%    | 63,560    | 445     | 218     | 33.3%   |
| 2019 | 38  | 91,315    | 155     | 236     | 5.9%    | 62,897    | 424     | 233     | 33.7%   |

*Note:* Authors' calculations from multiple-decrement life tables for real cohort risks of incarceration in state or federal prison.  $l_x$  represents the population remaining alive and never incarcerated at age  $x$ .  $d_x^I$  represents the number of decrements to first-time prison admission in the age interval.  $d_x^D$  represents the number of decrements to death in the age interval.  $r_x^I$  represents the cumulative lifetime risk of incarceration at age  $x$ .

**Table A6. Real and Projected Risk of Incarceration by Age, United States, by Year**

|           |    | Cohort     |      |      |      |      |      |      |      |      |      |      |      |      |      |      |      |      |      |      |      |      |     |
|-----------|----|------------|------|------|------|------|------|------|------|------|------|------|------|------|------|------|------|------|------|------|------|------|-----|
|           |    | 1999       | 2000 | 2001 | 2002 | 2003 | 2004 | 2005 | 2006 | 2007 | 2008 | 2009 | 2010 | 2011 | 2012 | 2013 | 2014 | 2015 | 2016 | 2017 | 2018 | 2019 |     |
|           |    | Birth Year |      |      |      |      |      |      |      |      |      |      |      |      |      |      |      |      |      |      |      |      |     |
| Age       |    | 1981       | 1982 | 1983 | 1984 | 1985 | 1986 | 1987 | 1988 | 1989 | 1990 | 1991 | 1992 | 1993 | 1994 | 1995 | 1996 | 1997 | 1998 | 1999 | 2000 | 2001 |     |
| All       | 20 | 1.1        | 1.0  | 1.0  | 0.9  | 0.9  | 0.9  | 0.9  | 0.9  | 0.9  | 0.9  | 0.9  | 0.8  | 0.8  | 0.8  | 0.7  | 0.6  | 0.6  | 0.6  | 0.5  | 0.5  | 0.5  |     |
|           | 25 | 3.2        | 3.2  | 3.1  | 3.1  | 3.1  | 3.1  | 3.0  | 3.0  | 3.0  | 2.9  | 2.8  | 2.8  | 2.7  | 2.5  | 2.3  | 2.1  | 2.1  | 2.0  | 1.9  | 1.9  | 1.9  |     |
|           | 30 | 4.9        | 4.9  | 4.7  | 4.7  | 4.6  | 4.6  | 4.6  | 4.5  | 4.5  | 4.3  | 4.2  | 4.1  | 4.0  | 3.8  | 3.6  | 3.5  | 3.4  | 3.3  | 3.3  | 3.2  | 3.2  |     |
|           | 35 | 6.0        | 5.9  | 5.8  | 5.7  | 5.6  | 5.6  | 5.6  | 5.5  | 5.5  | 5.3  | 5.3  | 5.1  | 5.0  | 4.8  | 4.6  | 4.5  | 4.4  | 4.3  | 4.3  | 4.3  | 4.2  |     |
|           | 40 | 6.8        | 6.7  | 6.6  | 6.5  | 6.4  | 6.4  | 6.4  | 6.3  | 6.3  | 6.1  | 6.0  | 5.9  | 5.8  | 5.6  | 5.4  | 5.3  | 5.2  | 5.1  | 5.1  | 5.0  | 5.0  |     |
|           | 45 | 7.3        | 7.3  | 7.1  | 7.1  | 6.9  | 7.0  | 6.9  | 6.9  | 6.8  | 6.7  | 6.6  | 6.5  | 6.3  | 6.1  | 6.0  | 5.8  | 5.7  | 5.7  | 5.6  | 5.6  | 5.6  | 5.6 |
|           | 50 | 7.7        | 7.6  | 7.5  | 7.4  | 7.3  | 7.3  | 7.3  | 7.2  | 7.2  | 7.0  | 7.0  | 6.8  | 6.7  | 6.5  | 6.3  | 6.2  | 6.1  | 6.0  | 6.0  | 6.0  | 6.0  | 5.9 |
| Men       | 20 | 2.0        | 1.8  | 1.7  | 1.7  | 1.6  | 1.6  | 1.6  | 1.7  | 1.7  | 1.7  | 1.7  | 1.6  | 1.5  | 1.4  | 1.3  | 1.2  | 1.1  | 1.0  | 0.9  | 0.9  | 0.9  |     |
|           | 25 | 5.9        | 5.8  | 5.6  | 5.6  | 5.5  | 5.5  | 5.4  | 5.3  | 5.3  | 5.2  | 5.0  | 4.9  | 4.7  | 4.3  | 4.0  | 3.8  | 3.6  | 3.5  | 3.4  | 3.3  | 3.3  |     |
|           | 30 | 8.8        | 8.6  | 8.3  | 8.2  | 8.0  | 8.0  | 7.9  | 7.8  | 7.8  | 7.5  | 7.3  | 7.1  | 6.9  | 6.5  | 6.2  | 6.0  | 5.8  | 5.7  | 5.6  | 5.5  | 5.5  |     |
|           | 35 | 10.5       | 10.3 | 10.0 | 9.8  | 9.6  | 9.6  | 9.5  | 9.4  | 9.4  | 9.1  | 8.9  | 8.7  | 8.5  | 8.1  | 7.8  | 7.6  | 7.4  | 7.3  | 7.2  | 7.1  | 7.1  |     |
|           | 40 | 11.8       | 11.5 | 11.2 | 11.1 | 10.8 | 10.8 | 10.8 | 10.6 | 10.6 | 10.3 | 10.2 | 9.9  | 9.7  | 9.4  | 9.0  | 8.8  | 8.6  | 8.5  | 8.4  | 8.4  | 8.3  |     |
|           | 45 | 12.7       | 12.4 | 12.1 | 12.0 | 11.7 | 11.7 | 11.6 | 11.5 | 11.5 | 11.2 | 11.1 | 10.8 | 10.6 | 10.2 | 9.9  | 9.7  | 9.5  | 9.4  | 9.3  | 9.3  | 9.2  |     |
|           | 50 | 13.3       | 13.0 | 12.7 | 12.6 | 12.3 | 12.3 | 12.3 | 12.1 | 12.1 | 11.8 | 11.7 | 11.4 | 11.2 | 10.9 | 10.5 | 10.3 | 10.1 | 10.0 | 9.9  | 9.9  | 9.9  |     |
| Black Men | 20 | 7.4        | 7.0  | 6.4  | 5.8  | 5.4  | 5.1  | 5.1  | 5.3  | 5.5  | 5.4  | 5.3  | 4.8  | 4.6  | 4.3  | 4.1  | 3.9  | 3.5  | 3.4  | 3.1  | 2.9  | 2.8  |     |
|           | 25 | 20.4       | 19.2 | 17.9 | 17.4 | 16.9 | 16.5 | 16.3 | 16.0 | 15.6 | 14.7 | 14.1 | 13.4 | 12.9 | 12.0 | 11.4 | 10.8 | 10.3 | 9.9  | 9.7  | 9.5  | 9.4  |     |
|           | 30 | 28.7       | 27.2 | 25.3 | 24.3 | 23.1 | 22.6 | 22.2 | 21.7 | 21.0 | 19.7 | 19.0 | 18.2 | 17.7 | 16.7 | 16.1 | 15.5 | 15.0 | 14.7 | 14.4 | 14.2 | 14.1 |     |
|           | 35 | 32.4       | 30.7 | 28.6 | 27.5 | 26.1 | 25.5 | 25.1 | 24.6 | 23.8 | 22.6 | 21.9 | 21.1 | 20.5 | 19.6 | 19.0 | 18.4 | 17.9 | 17.5 | 17.3 | 17.1 | 17.0 |     |
|           | 40 | 34.4       | 32.7 | 30.6 | 29.5 | 28.1 | 27.6 | 27.1 | 26.6 | 25.9 | 24.6 | 24.0 | 23.2 | 22.6 | 21.6 | 21.0 | 20.5 | 19.9 | 19.6 | 19.3 | 19.1 | 19.1 |     |
|           | 45 | 35.6       | 34.0 | 31.9 | 30.7 | 29.3 | 28.8 | 28.4 | 27.8 | 27.1 | 25.9 | 25.2 | 24.4 | 23.8 | 22.9 | 22.3 | 21.7 | 21.2 | 20.8 | 20.6 | 20.4 | 20.3 |     |
|           | 50 | 36.4       | 34.7 | 32.6 | 31.5 | 30.1 | 29.6 | 29.1 | 28.6 | 27.9 | 26.7 | 26.0 | 25.2 | 24.6 | 23.7 | 23.1 | 22.5 | 22.0 | 21.6 | 21.4 | 21.2 | 21.1 |     |
| White Men | 20 | 0.9        | 0.9  | 0.8  | 0.7  | 0.7  | 0.7  | 0.7  | 0.7  | 0.7  | 0.7  | 0.6  | 0.6  | 0.5  | 0.5  | 0.4  | 0.4  | 0.3  | 0.3  | 0.3  | 0.3  | 0.3  |     |
|           | 25 | 2.8        | 2.8  | 2.7  | 2.6  | 2.6  | 2.6  | 2.5  | 2.5  | 2.5  | 2.4  | 2.2  | 2.1  | 1.9  | 1.7  | 1.5  | 1.4  | 1.3  | 1.3  | 1.3  | 1.3  | 1.3  |     |
|           | 30 | 4.3        | 4.3  | 4.1  | 4.1  | 4.0  | 4.0  | 3.9  | 3.8  | 3.8  | 3.6  | 3.4  | 3.2  | 3.0  | 2.8  | 2.7  | 2.5  | 2.5  | 2.4  | 2.4  | 2.4  | 2.4  |     |
|           | 35 | 5.4        | 5.3  | 5.2  | 5.1  | 5.0  | 5.0  | 4.9  | 4.8  | 4.7  | 4.5  | 4.4  | 4.2  | 4.0  | 3.8  | 3.6  | 3.5  | 3.4  | 3.4  | 3.4  | 3.3  | 3.3  |     |
|           | 40 | 6.2        | 6.1  | 6.0  | 5.9  | 5.8  | 5.8  | 5.7  | 5.6  | 5.5  | 5.3  | 5.2  | 5.0  | 4.8  | 4.6  | 4.4  | 4.3  | 4.2  | 4.2  | 4.1  | 4.1  | 4.1  |     |



|                 |    |      |      |      |      |      |      |      |      |      |      |      |      |      |      |      |      |      |      |      |      |      |
|-----------------|----|------|------|------|------|------|------|------|------|------|------|------|------|------|------|------|------|------|------|------|------|------|
|                 | 45 | 6.8  | 6.7  | 6.6  | 6.5  | 6.4  | 6.4  | 6.3  | 6.2  | 6.1  | 5.9  | 5.8  | 5.6  | 5.4  | 5.2  | 5.0  | 4.9  | 4.8  | 4.8  | 4.7  | 4.7  | 4.7  |
|                 | 50 | 7.2  | 7.1  | 7.0  | 6.9  | 6.8  | 6.8  | 6.7  | 6.6  | 6.5  | 6.3  | 6.2  | 6.0  | 5.8  | 5.6  | 5.4  | 5.3  | 5.2  | 5.2  | 5.1  | 5.1  | 5.1  |
| Hispanic<br>Men | 20 | 1.7  | 1.5  | 1.6  | 1.7  | 1.8  | 1.8  | 1.8  | 1.8  | 1.8  | 1.9  | 1.9  | 1.9  | 1.8  | 1.7  | 1.6  | 1.6  | 1.5  | 1.4  | 1.2  | 1.1  | 1.1  |
|                 | 25 | 5.9  | 5.9  | 6.0  | 6.2  | 6.3  | 6.4  | 6.2  | 6.0  | 5.9  | 5.9  | 5.9  | 5.9  | 5.8  | 5.6  | 5.3  | 5.1  | 4.9  | 4.7  | 4.5  | 4.4  | 4.4  |
|                 | 30 | 9.6  | 9.4  | 9.4  | 9.4  | 9.2  | 9.3  | 9.3  | 8.9  | 8.9  | 8.8  | 8.9  | 8.8  | 8.6  | 8.4  | 8.1  | 7.9  | 7.7  | 7.5  | 7.3  | 7.3  | 7.2  |
|                 | 35 | 11.8 | 11.6 | 11.5 | 11.6 | 11.3 | 11.3 | 11.3 | 10.9 | 10.9 | 10.8 | 10.9 | 10.7 | 10.6 | 10.3 | 10.1 | 9.9  | 9.6  | 9.5  | 9.3  | 9.2  | 9.2  |
|                 | 40 | 13.4 | 13.2 | 13.0 | 13.1 | 12.9 | 12.8 | 12.8 | 12.4 | 12.5 | 12.4 | 12.4 | 12.3 | 12.1 | 11.9 | 11.6 | 11.5 | 11.2 | 11.0 | 10.8 | 10.8 | 10.7 |
|                 | 45 | 14.6 | 14.4 | 14.2 | 14.3 | 14.0 | 14.0 | 14.0 | 13.6 | 13.7 | 13.6 | 13.6 | 13.5 | 13.3 | 13.1 | 12.8 | 12.7 | 12.4 | 12.2 | 12.0 | 12.0 | 11.9 |
|                 | 50 | 15.4 | 15.2 | 15.0 | 15.1 | 14.9 | 14.8 | 14.8 | 14.4 | 14.5 | 14.4 | 14.4 | 14.3 | 14.1 | 13.9 | 13.6 | 13.5 | 13.2 | 13.0 | 12.8 | 12.8 | 12.8 |

*Note:* Authors' calculations from multiple-decrement life tables for real and synthetic cohort risks of incarceration in state or federal prison. Boxes shaded in gray represent estimates that required projections based on synthetic cohorts. Unshaded boxes are real cohort estimates of incarceration risk by age. For cohorts that reached the age before the end of the observation period (*birth year + age* ≤ 2019), the estimates shown here are real cohort estimates. For all other cohorts, we assume the 2019 incarceration rates would hold until the individuals reach age *x*. Thus, these estimates combine the real cohort estimates through 2019 and the projected synthetic cohort estimates for all years beyond 2019. For example, to estimate the risk of incarceration by age 40 for the 1981 birth cohort, we begin with our real cohort estimate by age 38 in 2019 and assume the 2019 incarceration rates held for individuals age 39 and 40 in 2020 and 2021.

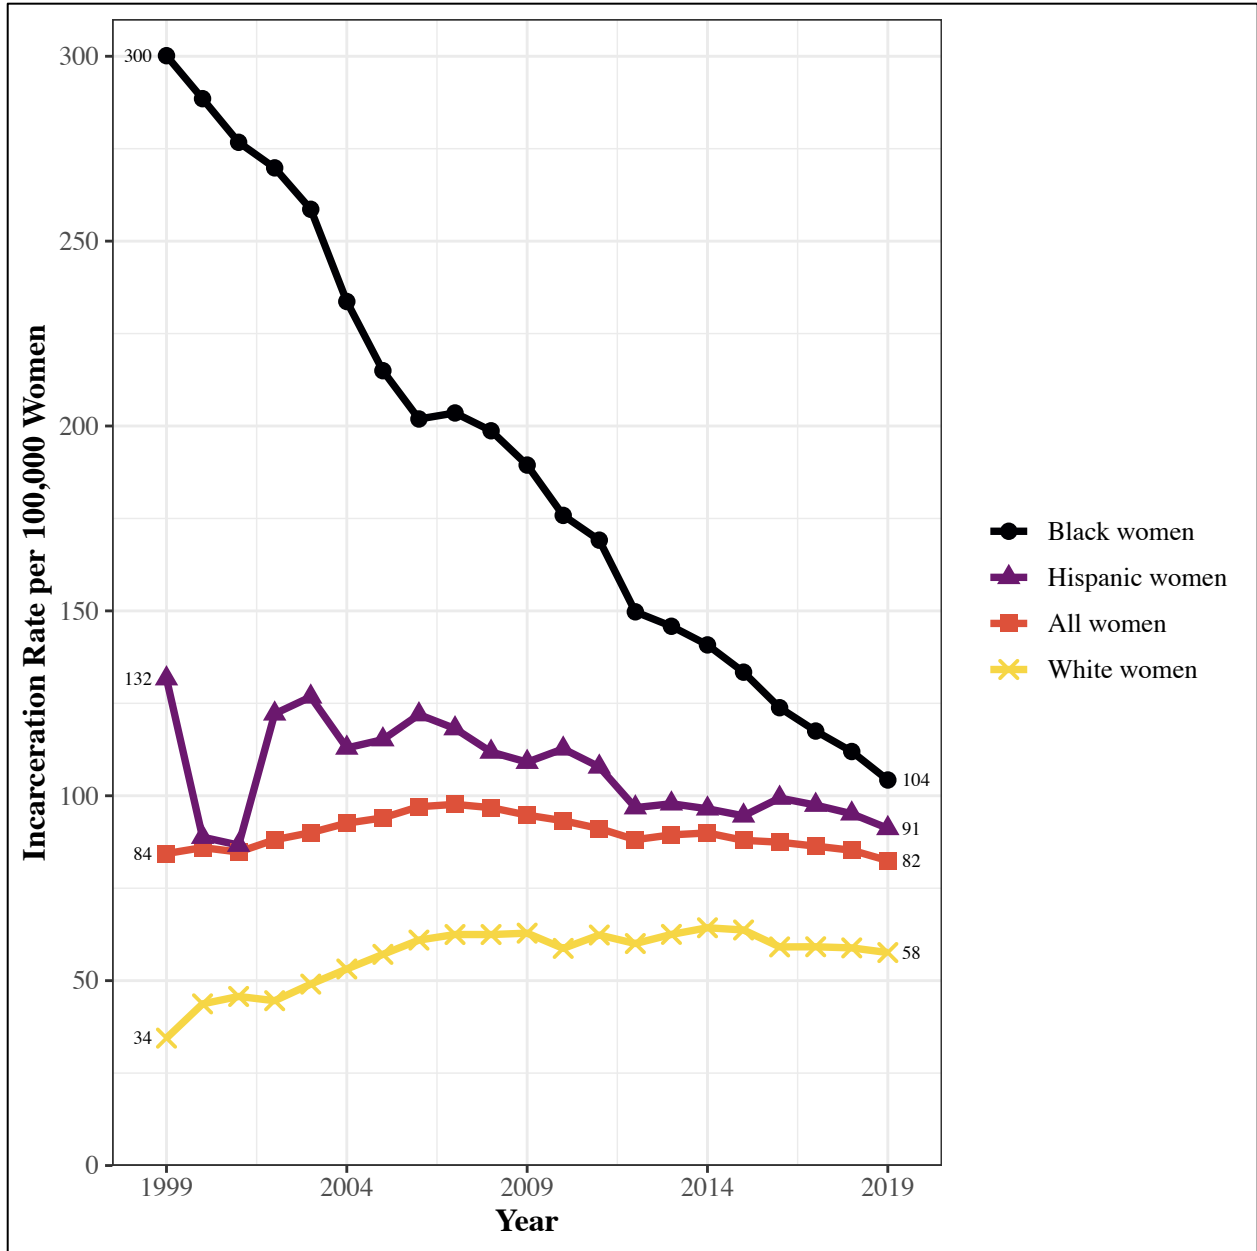

**Figure A1.** Incarceration Rates per 100,000 Adult Women, United States, 1999-2019

*Note:* Authors' calculations based on race-gender-specific counts of women in state and federal prisons and race-ethnicity-gender-specific estimates of the adult population.

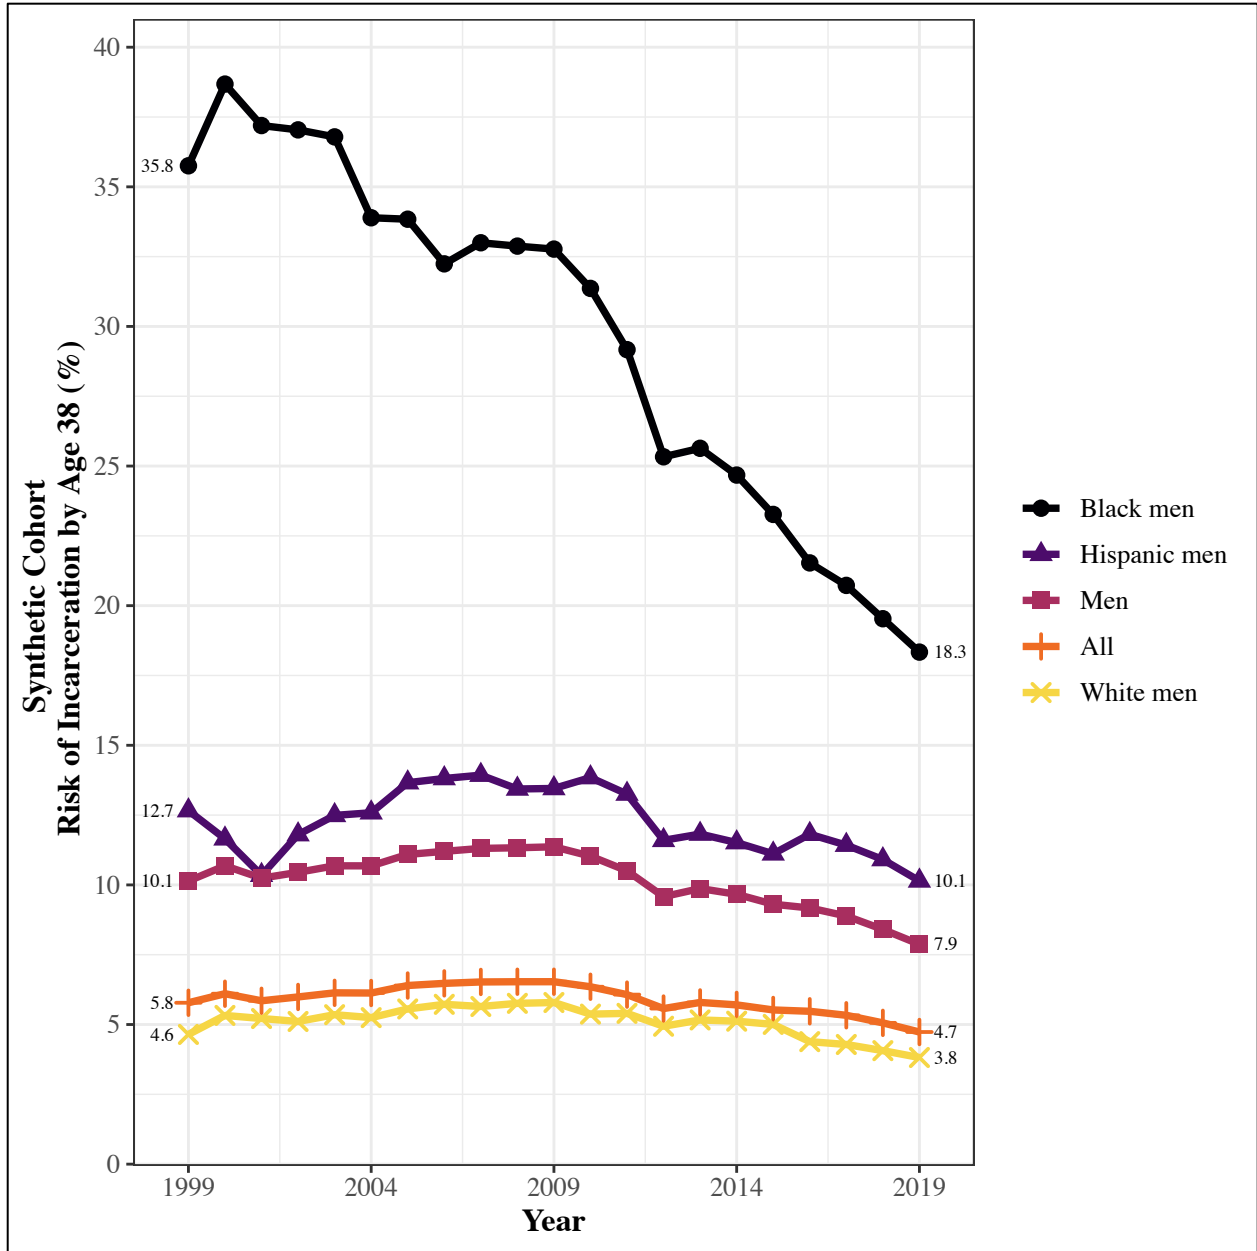

**Figure A2.** Synthetic Cohort Risk of Incarceration by Age 38, United States, 1999-2019.

*Note:* Authors' calculations from multiple-decrement life tables for synthetic cohort risks of incarceration in state or federal prison.
